# Supplementary material for: Synthesis and properties of octahedral Co3O4 single-crystalline nanoparticles enclosed by (111) facets
Source: Royal Society of Chemistry journal article supplement (doi:10.1039/c3ce41419a), 2013-01-01
Supplement: c3ce41419a.pdf [file c3ce41419a.pdf]

## Supporting Information

### **Synthesis and properties of octahedral $\text{Co}_3\text{O}_4$ single-crystalline nanoparticles enclosed by (111) facets**

*Hai Zhou<sup>a,b</sup>, Baoliang Lv<sup>a,\*</sup>, Dong Wu<sup>a</sup>, Yao Xu<sup>a</sup>*

<sup>a</sup>State Key Laboratory of Coal Conversion, Institute of Coal Chemistry, Chinese

Academy of Sciences, Taiyuan 030001, China

<sup>b</sup>University of Chinese Academy of Sciences, Beijing 100049, China

\*Corresponding author. Tel: +86-0351-4063121; Fax: +86-0351-4041153;

E-mail: [lbl604@sxicc.ac.cn](mailto:lbl604@sxicc.ac.cn)

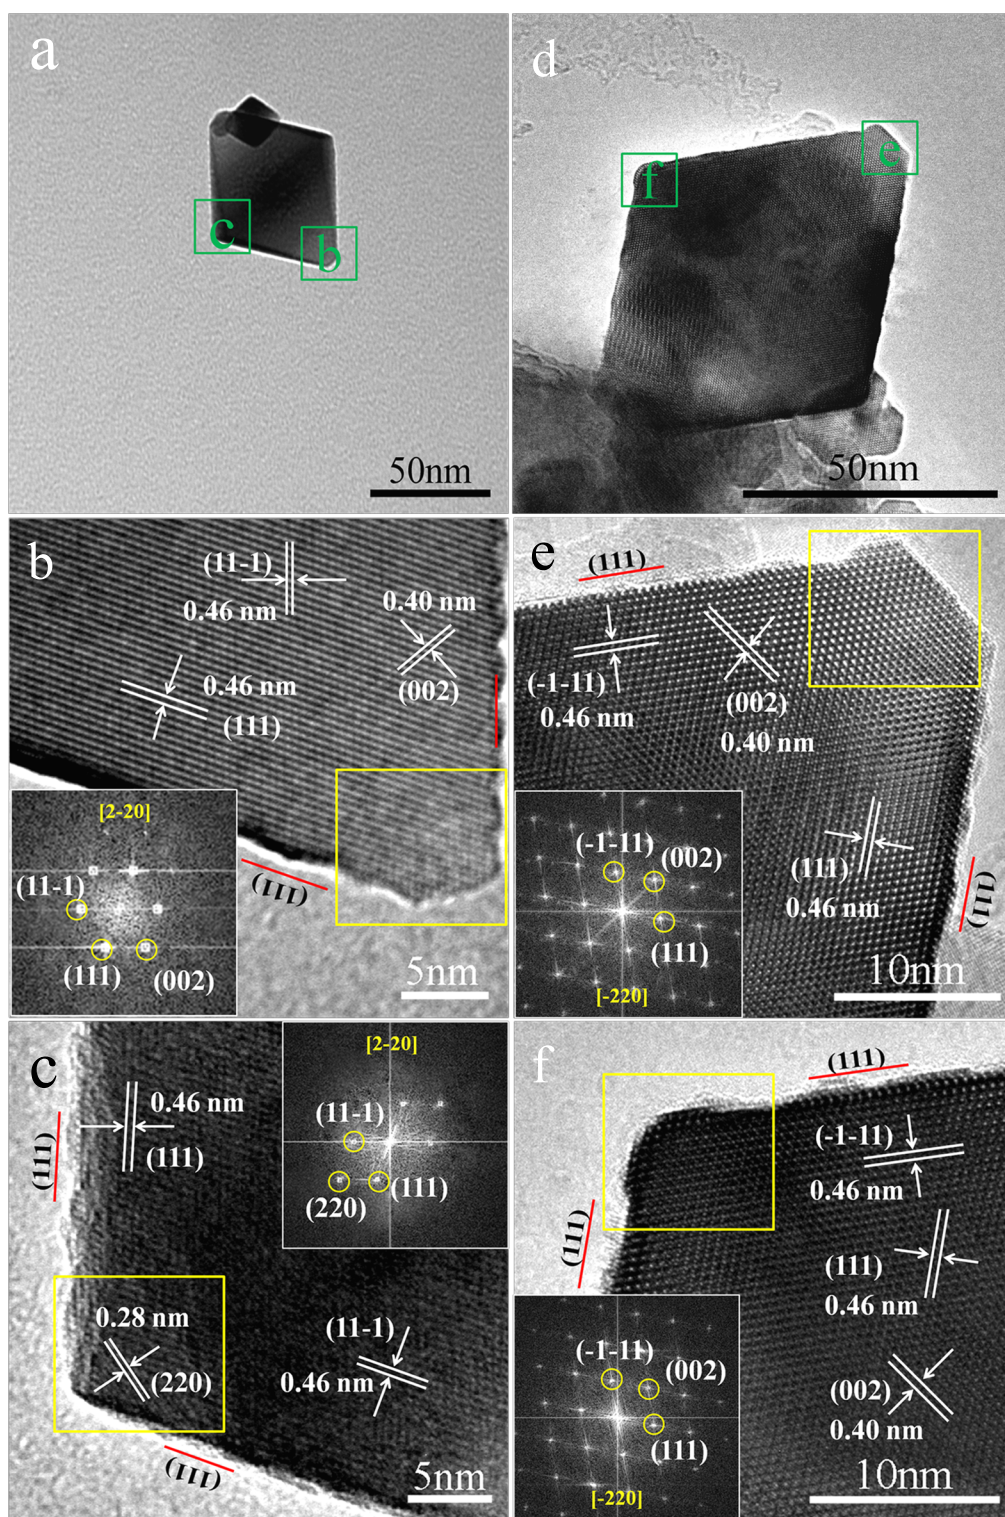

**Fig. S1** TEM and HRTEM images of two different octahedral  $\text{Co}_3\text{O}_4$  nanoparticles: (a) and (d) show the side-view of a single particle, respectively. (b)-(c) show the HRTEM images of regions b and c in (a); (e)-(f) show the HRTEM images of regions e and f in (d). And the insets in (b), (c), (e) and (f) are the corresponding FFT patterns taken from the yellow regions in each of the pictures.

## Synthesis of $\text{Co}_3\text{O}_4$ Nanocubes

For the preparation of  $\text{Co}_3\text{O}_4$  nanocubes, a typical synthesis process was as follows: 2 mM of NaSCN and 2 mM of  $\text{Co}(\text{CH}_3\text{COO})_2 \cdot 4\text{H}_2\text{O}$  were dissolved in 80 mL of distilled water under ultrasonic radiation, and then 0.003 mM PVP (K30) was added into the above mixture under ultrasonic radiation. The as-formed solution was sealed in a Teflon-lined autoclave of 150 mL capacity, and maintained at 120 °C for 36 h. After cooling to room temperature, the products were collected by centrifugation, and washed with distilled water three times and absolute ethanol twice to remove impurities. The final products were dried in air at 80 °C for 6 h.

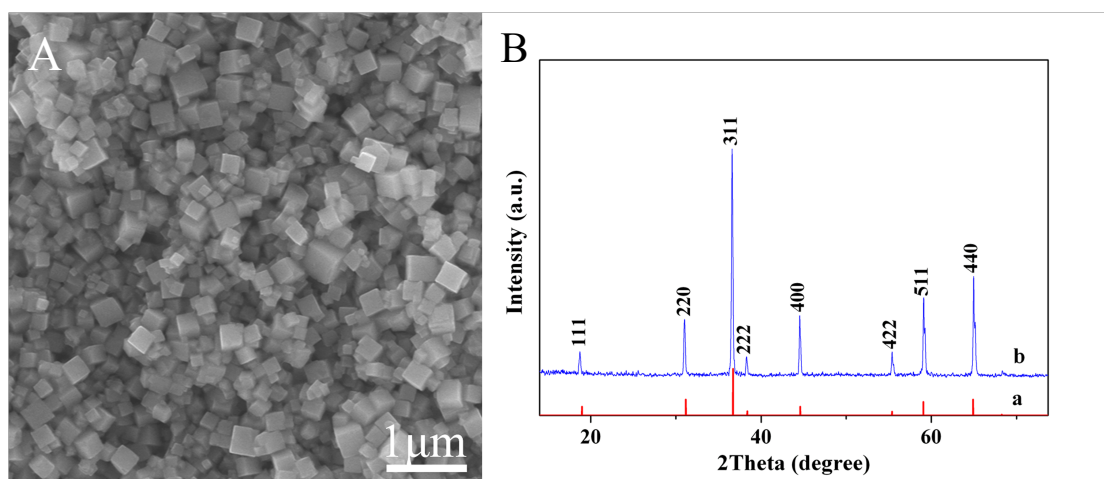

**Fig. S2** SEM image (A) and XRD patterns (B) for  $\text{Co}_3\text{O}_4$  nanocubes. And (a) and (b) in Figure (B) are the XRD patterns for JCPDS 42-1467 and  $\text{Co}_3\text{O}_4$  nanocubes, respectively.

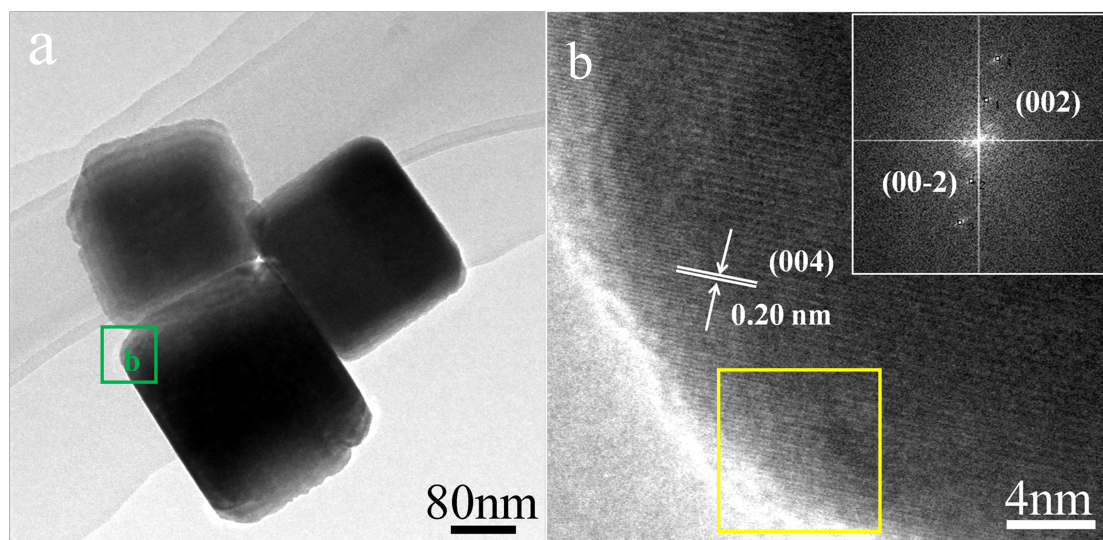

**Fig. S3** TEM and HRTEM images of  $\text{Co}_3\text{O}_4$  nanocubes: (a) the overview of some typical cubes, (b) shows the HRTEM image of region b in (a). The inset of (b) is the corresponding FFT pattern taken from the yellow region of picture.
